# Supplementary material
Source: PubMed Central journal article supplement (PMC2740755)

# A Summary of TRUC Neoplastic Microenvironment Gene Expression Data

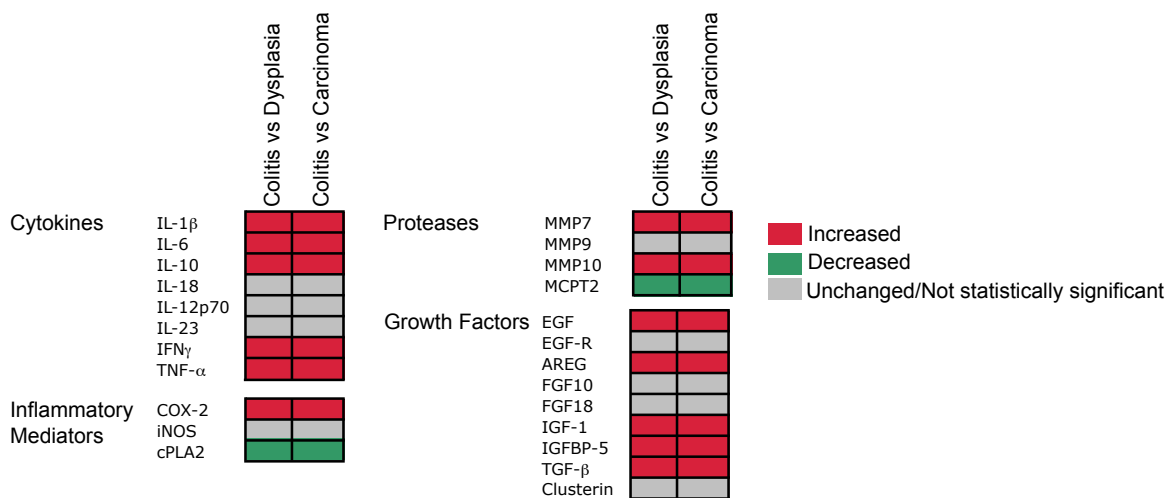

# B

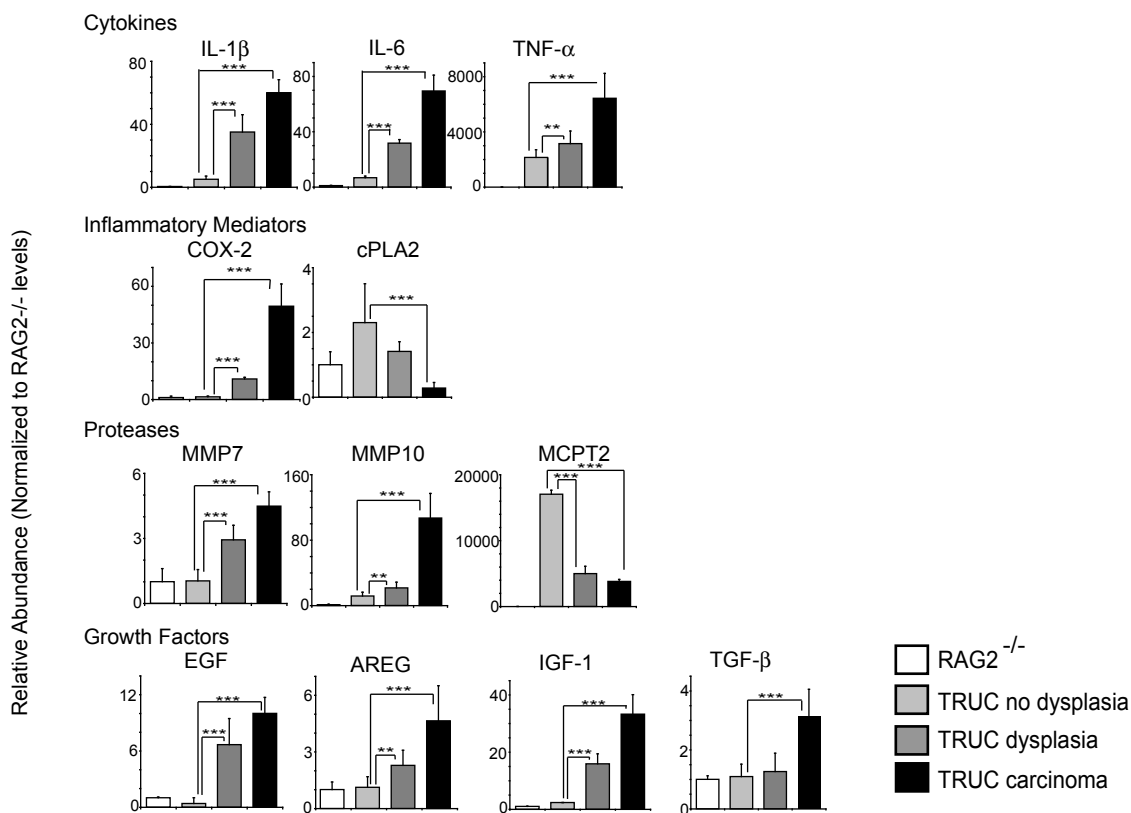

# C

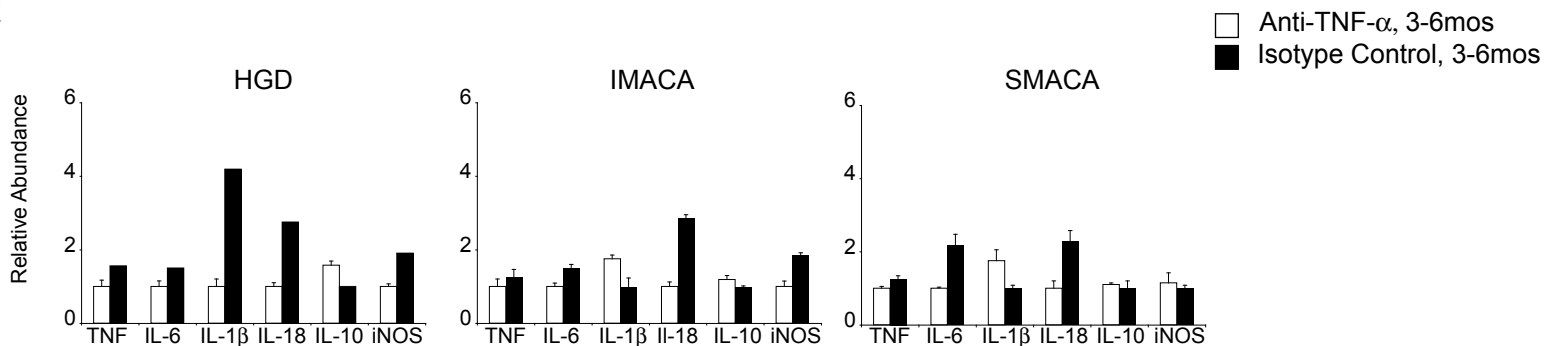

Supplement: NIHMS136360-supplement-01.pdf [file NIHMS136360-supplement-01.pdf]
